1 **Title**

2 **Development and validation of a next-gen health stratification**  
3 **engine to determine risk for multiple cardiovascular diseases**

4  
5 Mehrdad Rezaee<sup>1,2\*</sup>, Arsia Takeh<sup>1</sup>, Igor Putrenko<sup>1</sup>, Andrea Ganna<sup>3,4,5</sup>, and Erik Ingelsson<sup>6,7,8</sup>

6  
7 <sup>1</sup> Precision Wellness Inc., 1901 Embarcadero Rd #102, Palo Alto, CA, USA;

8 <sup>2</sup> Cardiac and Vascular Care, Inc. 2030 Forest Ave, San Jose, CA, USA;

9 <sup>3</sup> Program in Medical and Population Genetics, Broad Institute of MIT and Harvard, Cambridge,  
10 MA, USA;

11 <sup>4</sup> Stanley Center for Psychiatric Research, Broad Institute of MIT and Harvard, Cambridge, MA,  
12 USA;

13 <sup>5</sup> Analytic and Translational Genetics Unit, Department of Medicine, Massachusetts General  
14 Hospital, Boston, MA, USA;

15 <sup>6</sup> Department of Medicine, Division of Cardiovascular Medicine, Stanford University School of  
16 Medicine, Stanford, CA 94305, USA;

17 <sup>7</sup> Stanford Cardiovascular Institute, Stanford, CA 94305, USA;

18 <sup>8</sup> Stanford Diabetes Research Center, Stanford, CA 94305, USA.

19

20 \*Corresponding Author

21 E-mail: [mrezaee@precisionwellness.com](mailto:mrezaee@precisionwellness.com) (MR)

22



## 24 **Abstract**

25       Cardiometabolic diseases (CMD) impose greater impact on every aspect of health care  
26 than any other disease group. Accurate and in-time risk assessment of individuals for their  
27 propensity to develop CMD events is one of the most critical paths in preventing these  
28 conditions. The principal objective of the present study is to report the development, and  
29 validation of a next generation risk engine to predict CMD. UK Biobank population data was  
30 used to derive predictive models for six CMD. Missing data were imputed using imputation  
31 algorithms. Cox proportional hazard models were used to estimate annual absolute risk and  
32 relative risk of different risk factors for these conditions. In addition to conventional risk  
33 factors, the applied model included socioeconomic data, lifestyle factors and comorbidities as  
34 predictors of outcomes. In total, 416,936 individuals were included in the analysis. The  
35 derived prediction models achieved consistent and moderate-to-high discrimination  
36 performance (C-index) for all diseases: coronary artery disease (0.79), hypertension (0.82),  
37 type 2 diabetes mellitus (0.87), stroke (0.79), deep vein thrombosis (0.75), and abdominal  
38 aortic aneurysm (0.90). These results were consistent across age groups (37-73 years) and  
39 showed similar predictive abilities amongst those with pre-existing diabetes or hypertension.  
40 Calibration of risk scores showed that there was moderate overestimation of CMD-related  
41 conditions only in the highest decile of risk scores for all models. In summary, the newly  
42 developed algorithms, based on Cox proportional models, resulted in high discrimination and  
43 good calibration for several CMD. The integrations of these algorithms on a single platform  
44 may have direct clinical impact.

45

## 46 **Introduction**

47           Cardiometabolic diseases (CMD) continue to be the leading causes of death in the United  
48 States since the 1920s, and 45% of the U.S. population is projected to suffer from any of these  
49 diseases by 2035 [1]. The healthcare cost associated with these diseases represent one of the  
50 greatest global economic burdens [2]. As with any chronic condition, appropriate prevention  
51 and selective treatment for CMD are the most effective approaches to defer their clinical and  
52 financial impact on individuals and across populations.

53           Primary prevention of chronic diseases is a resource intensive, costly, and non-effective if  
54 applied through non-selective implementation [3]. Therefore, accurate population and  
55 individual stratification is needed to provide individualized, as well as population-specific  
56 care. In order to achieve clinically relevant risk stratification, established risk factors and  
57 novel population-specific data should be considered to derive clinically applicable prediction  
58 algorithms.

59           For over 20 years, the concept of cardiovascular risk assessment has been tested through  
60 prediction models that are utilized in the clinical setting [4-6]. Current prediction models  
61 have good discrimination abilities to identify individuals who will develop CMD. However,  
62 there are opportunities to address the limitations of current models, such as inclusion of  
63 contemporary risk factors, biomarkers and genetic information as part of the algorithms [7].  
64 Also, the currently systems are limited to only a few diseases, such as coronary artery disease  
65 and stroke, without consideration of major comorbidities. Moreover, current models do not  
66 allow for imputation for missing data; and finally, they are primarily directed to prevention of  
67 disease over a 10-year span. In this study, the development and validation of a next-gen  
68 stratification platform that integrates conventional clinical risk factors and biomarkers,

69 socioeconomic, lifestyle factors and other co-morbidities data for six cardiometabolic diseases  
70 (CMD) is presented. To derive these new predictions models, we used data provided by the  
71 UK Biobank (UKBB) project [8], including over 400,000 men and women aged 37–73 years,  
72 with 6.1 years of median longitudinal follow-up.

73

## 74 **Materials and methods**

### 75 **Baseline data preparation**

76 Baseline data on 502,616 UKBB participants collected at assessment centers to derive the  
77 prediction models. Overall, 95% of the UKBB participants were self-described as white, with  
78 women comprising 54.4% of the total. CMD outcomes were determined based on  
79 International Classification of Diseases (ICD) edition 10 (ICD-10) codes, as well as self-  
80 reports for coronary artery disease (CAD), hypertension (HPT), type 2 diabetes mellitus  
81 (DM2), and deep vein thrombosis (DVT), and medications for CAD, HPT, and DM2. Six  
82 distinct datasets for each CMD were engineered. CAD was defined as I20–I25 and T82 codes.  
83 HPT was defined as I10, I15, and R03.0 codes. DM2 was defined as E11, E13, and E14  
84 codes. Stroke was defined as G46.3, G46.4, I63, I66, I67, and I693 codes. DVT was defined  
85 as H34.8, H40.8, I23.6, I24.0, I63, I67.6, I74, I81, I82, I87.2, I87.3, K64.5, N48.8, N52.0,  
86 O03.3, O03.8, O04.8, O07.3, O08.7, 022, O87, Q26, T82.8, T83.8, T84.8, T85.8, and Z86.7  
87 codes. Abdominal aortic aneurysm (AAA) was defined as I71 and I79.0 codes.

88 The UKBB data were subsequently linked to hospital episode statistics (HES) data from  
89 hospitals in England, Scotland and Wales. The age and date of a CMD event were determined  
90 based on primary or secondary ICD-10 codes in the HES data corresponding to the event  
91 using the earliest hospital record. The date of inclusion into the UKBB was defined as  
92 baseline and was used as starting point for time-to-event calculations. The exit date was  
93 determined as either date of death, end of follow-up (February 29, 2016), or a CMD event,  
94 whichever happened first. Only those CMD-positive cases that were identified by ICD-10  
95 codes, self-reports, or medication as described above and had the date of the event determined

96 based on the HES data were included into analyses, reducing the number of participants to  
97 416,936. In addition, participants with prior CMD events (before baseline) were excluded  
98 from analyses of that specific event, e.g. those with prior CAD event were excluded from the  
99 CAD analyses and so on.

100 The datasets created for each CMD were spitted into training and testing sets based on  
101 80%/20% ratio. Testing sets were used for model validation and calibration. Age- and CMD-  
102 specific testing sets were created by applying corresponding age and disease filters onto  
103 general test datasets (without reusing any data from the training sets to avoid overfitting).

## 104 **Variable definition**

105 To develop highly predictive CMD risk prediction models, in addition to using already  
106 available UKBB data fields, the new variables were derived that captured sociodemographic  
107 and socioeconomic factors, laboratory test results, physiological measurements, physical  
108 activity, nutrition, alcohol consumption, family history of CMD; as well as the presence of  
109 diseases, disorders, or previous surgeries as shown in Table 1.

110

111

112

113

114

115

116

117

118 **Table 1. Profile of variables for predicting the risk of six CMD.**

|                                                   | Type        | N      | 5%                      | 25%                      | 50%                 | 75%                   | 95%                    |
|---------------------------------------------------|-------------|--------|-------------------------|--------------------------|---------------------|-----------------------|------------------------|
| Sex                                               | binary      | 416936 | women                   | women                    | women               | men                   | men                    |
| BMI                                               | continuous  | 414265 | 20.84                   | 23.94                    | 26.48               | 29.58                 | 35.82                  |
| DBP                                               | continuous  | 415742 | 66                      | 75                       | 81                  | 88                    | 98.5                   |
| Age                                               | continuous  | 416936 | 42                      | 49                       | 57                  | 63                    | 68                     |
| FEV1                                              | continuous  | 376770 | 60.83                   | 82.19                    | 93.79               | 104.38                | 119.88                 |
| Current smoking                                   | binary      | 414793 | no                      | no                       | no                  | no                    | yes                    |
| Past smoking                                      | binary      | 412557 | no                      | no                       | yes                 | yes                   | yes                    |
| Family history of CAD                             | categorical | 359472 | no                      | no                       | no                  | yes (1) <sup>a</sup>  | yes (2) <sup>b</sup>   |
| Family history of DM2                             | categorical | 385973 | no                      | no                       | no                  | no                    | mother                 |
| Family history of high blood pressure             | categorical | 389301 | no                      | no                       | no                  | father                | father and mother      |
| Family history of stroke                          | categorical | 386630 | no                      | no                       | no                  | father                | mother                 |
| Physical activity (MET x hours/week)              | continuous  | 379178 | 5.78                    | 16                       | 32                  | 63                    | 175.1                  |
| Coffee consumption (cups)                         | continuous  | 415021 | 0                       | 0                        | 2                   | 3                     | 6                      |
| Alcohol score                                     | continuous  | 288169 | 0                       | 0                        | 2.5                 | 10                    | 10                     |
| AHEI score                                        | continuous  | 199435 | 2.5                     | 10                       | 10                  | 20.08                 | 44.5                   |
| Surgery history                                   | binary      | 322522 | no                      | no                       | no                  | no                    | yes                    |
| Hormone replacement therapy                       | categorical | 403518 | no                      | no                       | no                  | no                    | recent user (<3 years) |
| Hypercholesterolemia medication excluding aspirin | binary      | 416936 | no                      | no                       | no                  | no                    | yes                    |
| Sleep apnea                                       | binary      | 416936 | no                      | no                       | no                  | no                    | no                     |
| Irritable bowel syndrome                          | binary      | 416936 | no                      | no                       | no                  | no                    | no                     |
| Heart valve problem                               | binary      | 416936 | no                      | no                       | no                  | no                    | no                     |
| Arrhythmia                                        | binary      | 416936 | no                      | no                       | no                  | no                    | no                     |
| Congestive heart failure                          | binary      | 416936 | no                      | no                       | no                  | no                    | no                     |
| Hyperthyroidism                                   | binary      | 416936 | no                      | no                       | no                  | no                    | no                     |
| Education                                         | categorical | 408500 | no                      | professional             | professional        | college or university | college or university  |
| Income (£)                                        | categorical | 353335 | <18,000                 | 18,000 - 30,999          | 31,000 - 51,999     | 52,000 - 100,000      | >100,000               |
| Insomnia                                          | categorical | 415605 | never/rarely            | sometimes                | sometimes           | usually               | usually                |
| Sleep duration (hours)                            | categorical | 416117 | >4 and <6 or >9 and <11 | >=6 and <7 or >8 and <=9 | >=7 and <=8         | >=7 and <=9           | >=7 and <=10           |
| Lymphocyte                                        | categorical | 395894 | >0.8 and <4.8           | >0.8 and <4.8            | >0.8 and <4.10      | >0.8 and <4.10        | >0.8 and <4.10         |
| Monocyte                                          | categorical | 395894 | >0.2 and <0.9           | >0.2 and <0.9            | >0.2 and <0.9       | >0.2 and <0.9         | <=0.2                  |
| MCH                                               | categorical | 396632 | >=27 and <=34           | >=27 and <=34            | >=27 and <=34       | >=27 and <=34         | >34                    |
| Platelet                                          | categorical | 396631 | >=150 and <= 440        | >=150 and <= 440         | >=150 and <= 440    | >=150 and <= 440      | >=150 and <= 440       |
| RDW                                               | categorical | 396633 | >= 11.6 and <= 14.6     | >= 11.6 and <= 14.6      | >= 11.6 and <= 14.6 | >= 11.6 and <= 14.6   | >14.6                  |
| CAD age                                           | continuous  | 13607  | 45                      | 54                       | 58                  | 62                    | 67                     |
| DM2 age                                           | continuous  | 8316   | 43                      | 53                       | 58                  | 63                    | 67                     |
| HPT age                                           | continuous  | 36546  | 44                      | 54                       | 59                  | 63                    | 67                     |
| DVT age                                           | continuous  | 7379   | 41                      | 51                       | 58                  | 62                    | 67                     |



119 Types of variables, number of UKBB participants for each variable, and mean values (mode  
120 categories for categorical and binary variables) for different percentiles are shown. The  
121 number of participants for the CMD age variables corresponds to the number of prevalent  
122 cases.

123 <sup>a</sup>Either father, mother, or sibling

124 <sup>b</sup>Any combination of two of the following: father, mother, or sibling

125

126 Physical activity was assessed as the metabolic equivalent of task (MET) calculated in  
127 hours/week according to the "Guidelines for Data Processing and Analysis of the International  
128 Physical Activity Questionnaire (IPAQ) [9]. MET coefficients are indicated in Table 1.  
129 Alcohol score was calculated according to Alternative Healthy Eating Index (AHEI)  
130 guidelines [10]. One alcohol serving corresponded to 11.4 grams of alcohol. Further, a  
131 nutrition AHEI score was calculated as a sum of scores for the following nutrition categories:  
132 vegetables, fruits, grains, sugar sweetened beverages and fruit juices, nuts, meat, fish, PUFA,  
133 and alcohol. The nutrition scores were calculated according to AHEI guidelines [10].

134 In addition to the predicted CMD (target CMD), participants could of course experience  
135 other competing CMD outcomes. We used the age of experiencing these non-target diseases  
136 as an additional risk factor. For participants that did not experience a CMD event before  
137 baseline (CMD-negative cases), the age of CMD was set to 100. This approach allowed for  
138 incorporating time-dependent data without using the limitations of a modification of the Cox  
139 model, such as a Cox proportional hazards time varying model, which is often used to address  
140 time-dependency of predictors.

## 141 **Imputation of missing values**

142 Multiple imputation by chained equations (MICE) implemented in Python (fancyimpute  
143 0.3.1) and Bayesian ridge regression with the regularization parameter lambda of 0.001 was  
144 used for the imputation of missing values of continuous variables [11]. Parameters included  
145 initial filling with mean values, monotone visit sequence, the number of imputations = 100,  
146 the number of burn-in iterations = 10, no maximum and minimum possible imputed values,  
147 imputing with samples from posterior predictive distribution, the number of nearest neighbors  
148 for probabilistic moment matching = 5, and use of all columns to estimate current column.  
149 Cases with missing values in categorical variables were dropped before the imputation, and  
150 continuous variables were scaled to a range between 0 and 1.

## 151 **Variable selection for predictive modeling**

152 Several approaches were employed for selecting variables included in the prediction  
153 model. Multicollinearity was first identified using pairwise correlation matrix (pandas  
154 0.20.1), and the variables with the Pearson correlation coefficient higher than 0.3 were  
155 removed from the dataset. Recursive variable elimination with stratified 2-fold cross-  
156 validation (RFECV) on training datasets was then used to determine optimal number of  
157 variables by recursively considering smaller and smaller sets of variables (scikit-learn 0.20.0).  
158 One variable was removed at each iteration, minimum number of variables to be selected was  
159 one, and accuracy was used for scoring.

160 RFECV was used in combination with balanced random forest (imbalanced-learn 0.4.2)  
161 bivariate classification model. Parameters of the random forest model included the number of  
162 estimators = 100, Gini impurity as the quality of split, 'auto' sampling strategy, maximum

163 depth of the decision tree = 0, minimum number of samples required to split an internal node  
164 = 2, minimum number of samples required to be at a leaf node = 1, minimum weighted  
165 fraction of the sum total of weights required to be at a leaf node = 0, the number of variables  
166 to consider when looking for the best split = 'auto', unlimited number of leaf nodes, minimum  
167 impurity decrease threshold for node splitting = 0, bootstrapping, random sampling without  
168 replacement, no use out-of-bag samples to estimate the generalization accuracy, the number  
169 of jobs to run in parallel for both fit and predict = 1, resampling all classes, but the minority  
170 class, the verbosity of the tree building process = 0, and balanced class weights.

171 In addition, principal component analysis (PCA) was used to validate the selection of  
172 variables and to avoid overfitting and poor calibration by determining that the number of  
173 selected variables is similar to the optimal number of principal components (scikit learn  
174 0.20.0). The number of components to be retained was determined by using maximum-  
175 likelihood density estimation and full singular value decomposition (utilizing LAPACK  
176 library solver) as parameters of the PCA function, which applies Bayesian model selection to  
177 probabilistic PCA in this configuration [12].

## 178 **Predictive models and performance metrics**

179 Linear Cox proportional hazard (PH) models and non-linear ensemble survival models  
180 were developed using lifelines 0.13.0 and scikit-survival 0.5 Python libraries, respectively.  
181 Two types of non-linear models were developed: decision tree-based gradient-boosting using  
182 Cox PH loss and gradient boosting with component-wise cubic smoothing splines as base  
183 learners.

184 Discriminative ability of the risk prediction models was assessed by Harrell's  
185 concordance index (c-index) [13, 14, 15] calculated for testing datasets as the proportion of all  
186 comparable pairs in which the predictions and outcomes were concordant. Case pairs were  
187 comparable if at least one of them was CMD-positive. If the estimated risk was larger for the  
188 case with a lower time of event/censoring, the prediction of that pair was counted as  
189 concordant. If predictions were identical for a pair, 0.5 was added to the count of  
190 concordance. A pair was not comparable if an event occurred for both of them at the same  
191 time or an event occurred for one of them, but the time of censoring was smaller than the time  
192 of event of the first one. Prognostic indexes were used for the calculation of c-index.

193 In addition to c-index, we also used an additional metric for assessing the discriminative  
194 ability of Cox PH models, which was based on statistical 'distance' between the probabilities  
195 of experiencing a CMD event at certain time predicted for individuals from CMD-positive  
196 and CMD-negative groups. In the 'distance' approach, statistical significance of the difference  
197 between the two groups of probabilities was determined using one-way ANOVA. The result  
198 of this test was reported as an  $F$ -statistic with corresponding  $p$ -value.

199 Calibration of Cox PH models was evaluated by the Hosmer-Lemeshov goodness-of-fit  
200 test [16] and a calibration plot. The Hosmer-Lemeshov test was computed by partitioning the  
201 testing set into decile groups based on the predicted absolute risk of CMD events at time  
202 horizon of 5 years. Then, the number of CMD-positive and CMD-negative cases and the sum  
203 of the predicted probabilities for the both types of cases was calculated in each group as  
204 observed and not observed, and expected and not expected numbers, correspondingly. The  
205 Hosmer-Lemeshov test statistic was calculated using the following formula:

206 
$$H = \sum_{q=1}^{10} \frac{(\text{Observed}.A - \text{Expected}.A)^2}{\text{Expected}.A} + \frac{(\text{Observed}.not.A - \text{Expected}.not.A)^2}{\text{Expected}.not.A}$$

207 The resulted chi-square statistic was assessed using 8 degrees of freedom and was reported  
208 with  $p$ -value. A calibration plot was created by plotting the predicted risk probabilities against  
209 the observed risks for each group.

## 210 **Results**

211 The study characteristics and the prevalence of six CMD at baseline for 416,936 UKB  
212 participants that include CMD-positive cases that were identified by ICD-10 codes, self-  
213 reports, or medication and had the date of the event determined based on the HES data are  
214 shown in Tables 1 and 2. Average age of men and women in this population was  $56.3 \pm 8.3$   
215 and  $56 \pm 8.1$  years, correspondingly. During follow-up (median 6.1 years), 98,254 incident  
216 CMD events occurred in 67,785 participants that were free from the disease at baseline (Table  
217 2).

218 **Table 2. Prevalent and incident events for various CMD.**

|               | Men              |                 | Women            |                 |
|---------------|------------------|-----------------|------------------|-----------------|
|               | Prevalent events | Incident events | Prevalent events | Incident events |
| <b>CAD</b>    | 9442 (5.11%)     | 9560 (5.17%)    | 4165 (1.79%)     | 5479 (2.36%)    |
| <b>HTN</b>    | 19489 (10.54%)   | 27939 (15.11%)  | 17057 (7.35%)    | 24724 (10.66%)  |
| <b>DM2</b>    | 5155 (2.79%)     | 7590 (4.1%)     | 3161 (1.36%)     | 5209 (2.25%)    |
| <b>Stroke</b> | 740 (0.4%)       | 1866 (1.01%)    | 446 (0.19%)      | 1290 (0.56%)    |
| <b>DVT</b>    | 3870 (2.09%)     | 7387 (4.0%)     | 3509 (1.51%)     | 6447 (2.78%)    |
| <b>AAA</b>    | 241 (0.13%)      | 644 (0.35%)     | 38 (0.016%)      | 119 (0.051%)    |

219 The prevalence of CMD at the baseline and incidence of CMD during the follow-up are shown in  
220 parenthesis.

221

## 222 **Imputation of missing data**

223 Initial data quality evaluation showed that the number of missing values for examined  
224 variables (Table 1) varied from 0 to ~52% with the mean of 6.3%, resulting in the no-null  
225 values dataset sizes of ~78K – 81K (vs. initial ~380K – 416K). As discussed in the methods,  
226 imputation of missing values for all continuous variables (Table 1) excluding CMD age  
227 variables, increased the sizes of CMD-specific datasets for predictive modeling to up to  
228 ~195K – 215K. The discriminative ability of the CAD risk model trained on the imputed  
229 dataset with the sample size of 165,877 was tested on both imputed and unimputed datasets  
230 with the same sample size of 41,470 to validate the imputation. C-indexes calculated on the  
231 imputed and unimputed testing sets were 0.787 and 0.803, implying higher discriminative  
232 ability of the CAD model when tested on original, unimputed data.

## 233 **Predictive modeling**

234 The discriminative ability of all Cox PH CMD models trained on the general population  
235 after the imputation of missing data varied between the diseases with highest and lowest c-  
236 indexes of 0.88 and 0.748 for AAA and DVT, respectively (Table 3). Cox PH models were  
237 further applied to calculate the risk probabilities of occurrence of a CMD event at 5 years  
238 following the initial observation. This time-to-event prediction was evaluated through  
239 determination of the statistical ‘distance’ between CMD-positive and CMD-negative test  
240 subgroups’ risk scores (Table 3). *F*-statistic values for the CMD models were highest for the  
241 models with high discriminative ability, except for the AAA model due to the low prevalence  
242 of this disease.

243

244

245 **Table 3: Performance of CMD risk prediction models.**

|               | C-index | Hosmer-Lemeshov test |                 | ANOVA test          |                 |
|---------------|---------|----------------------|-----------------|---------------------|-----------------|
|               |         | chi-2                | <i>p</i> -value | <i>F</i> -statistic | <i>p</i> -value |
| <b>CAD</b>    | 0.787   | 55                   | < 0.0001        | 24.7                | 1.80E-04        |
| <b>HPT</b>    | 0.817   | 155                  | < 0.0001        | 44.6                | 8.04E-07        |
| <b>DM2</b>    | 0.873   | 54                   | < 0.0001        | 36.6                | 1.20E-06        |
| <b>Stroke</b> | 0.783   | 18                   | 0.02            | 17.6                | 6.20E-03        |
| <b>DVT</b>    | 0.748   | 45                   | < 0.0001        | 18.7                | 5.00E-03        |
| <b>AAA</b>    | 0.88    | 17                   | 0.03            | 15                  | 1.20E-03        |

246 Performance is by c-index (discrimination), Hosmer-Lemeshov test (calibration), and the  
247 statistical ‘distance’ approach based on one-way ANOVA test (discrimination of risk  
248 probabilities). CMD-positive and negative groups were bootstrap sampled with replacement  
249 (N=100) to provide comparable *F*-statistic (*p*-values) across different disease endpoints.

250

251 Probability density function, which specifies the probability of predictions falling within  
252 a particular range of values for individuals from CMD-positive and CMD-negative test  
253 subgroups (Fig 1) was used for the visualization of the statistical ‘distance’ approach. The  
254 probability density function of the risk scores, as well as their distributions derived from  
255 different CMD models demonstrated that the range of risk scores for the CMD-positive  
256 subgroup was higher than that for the CMD-negative subgroup, and increased for CMD  
257 models characterized by higher c-index. Higher ratio between maximum values of the two  
258 probability density functions corresponded to higher discriminative ability.



**Figure 1**

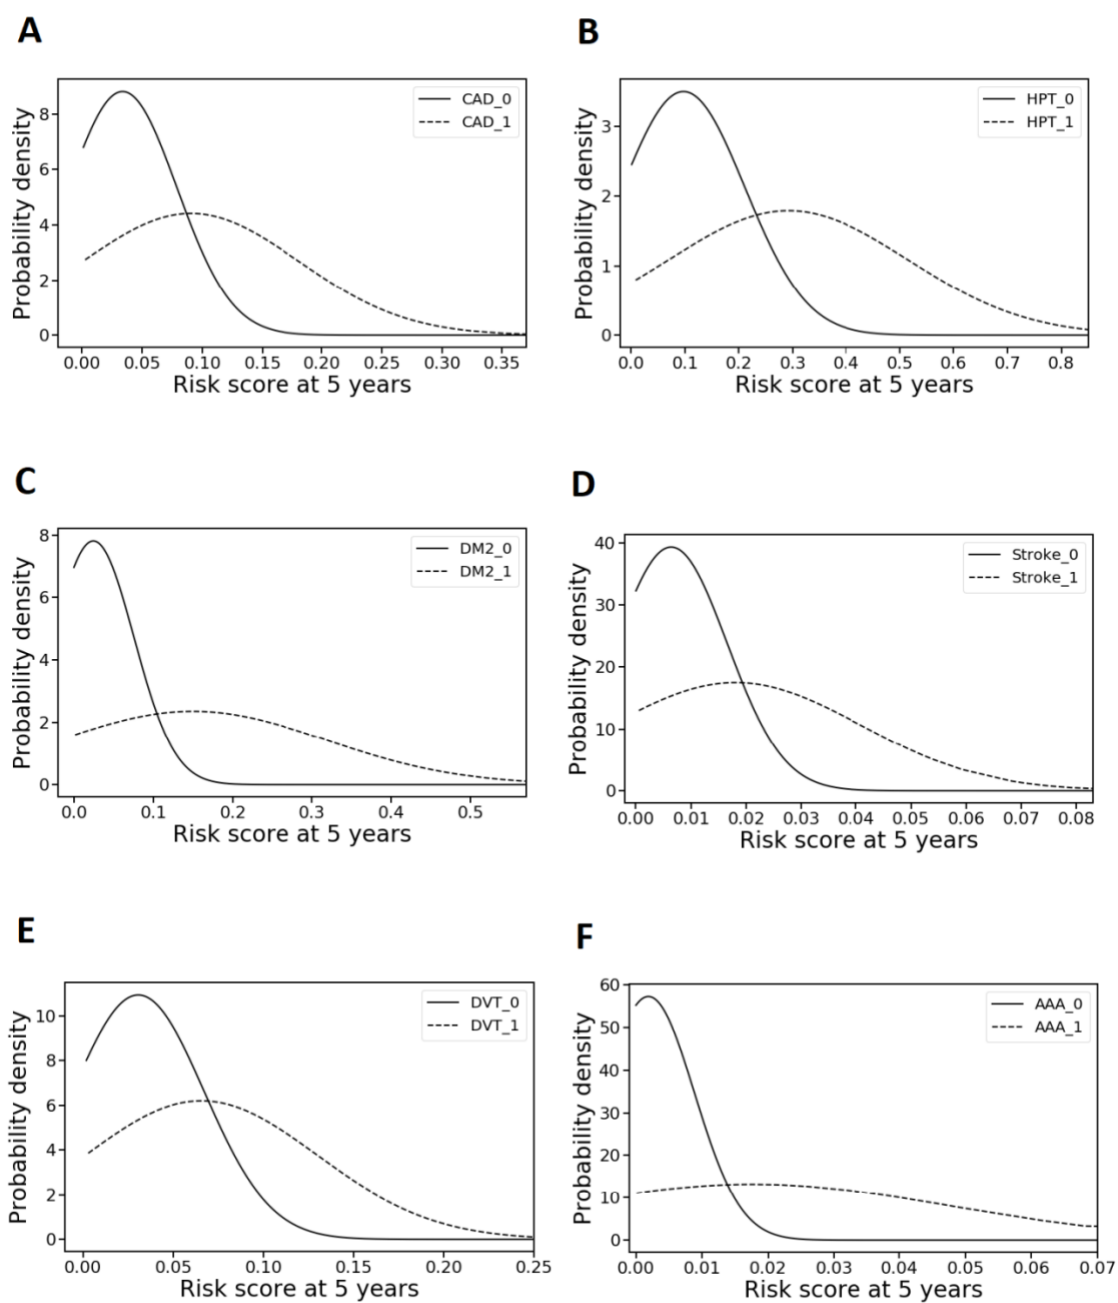

260 **Fig 1. Statistical ‘distance’ approach.** Probability density function expressed in relation to  
261 risk scores for six diseases (A-F) comparing participants developing CMD (CMD-positive,  
262 \_1) and those who did not develop (CMD-negative, \_0) within 5 years of follow up.

263

264 Assessment of the calibration properties for the CMD predictive models as calculated by  
265 the Hosmer-Lemeshow test (Table 3) and visualized by the calibration plot (Fig 2) showed  
266 adequate overall calibration, but moderate overestimation of CMD risk in the highest decile of  
267 risk scores.

**Figure 2**

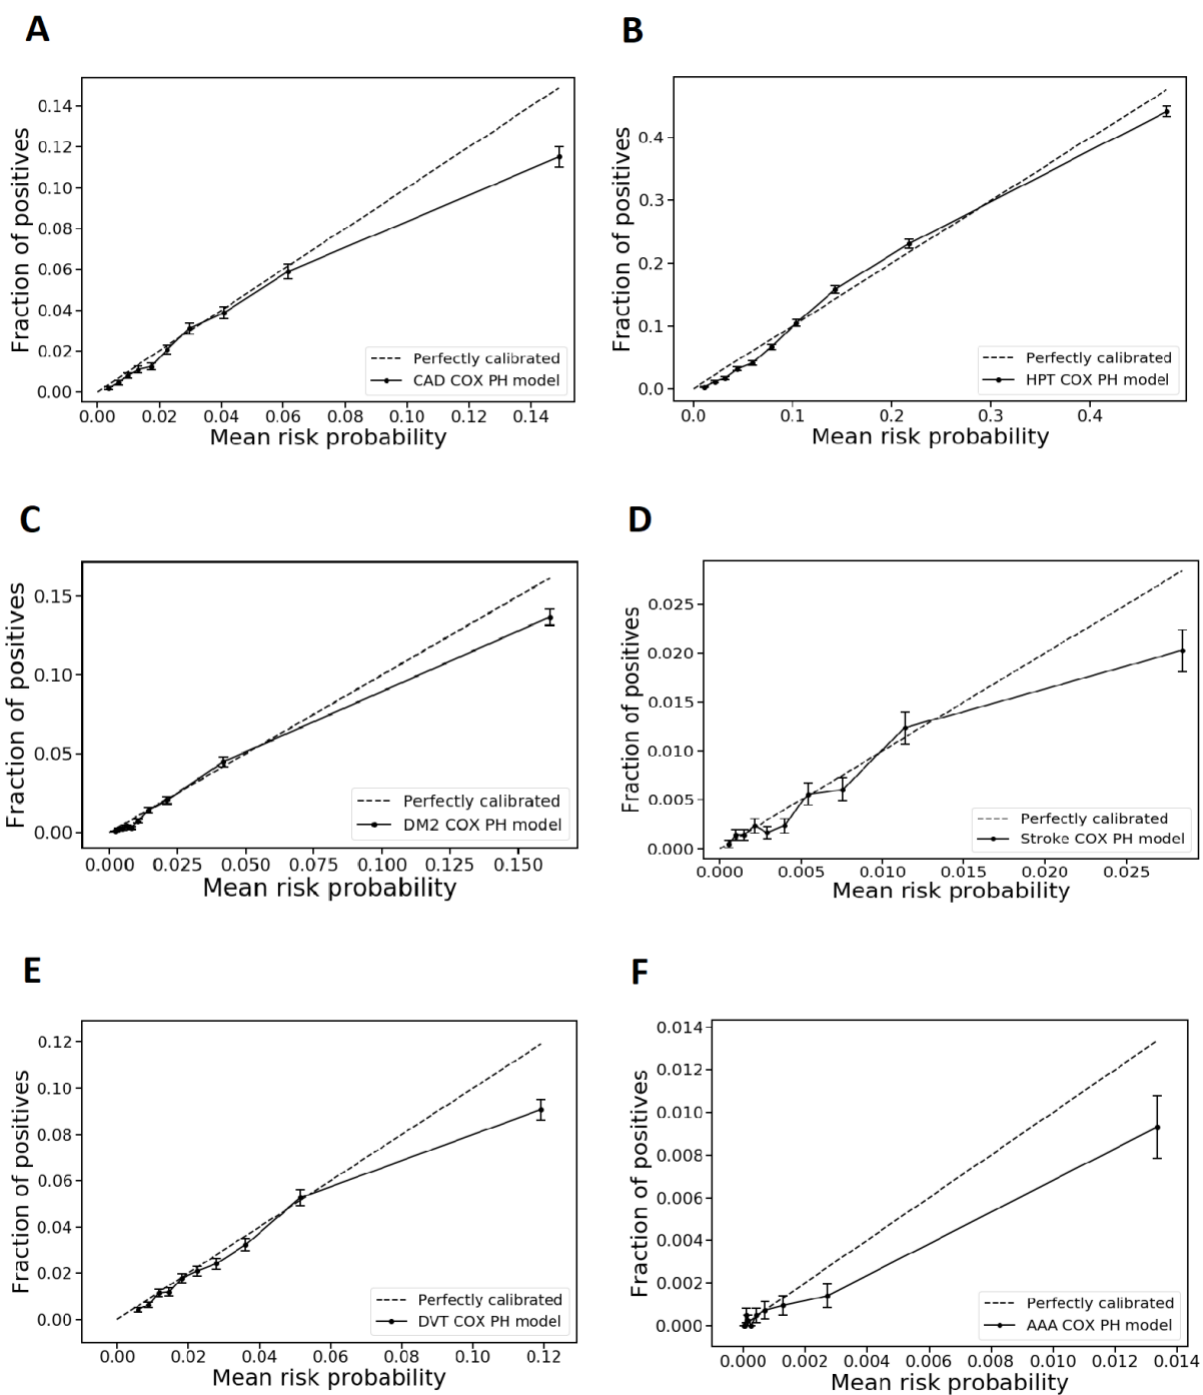

269 **Fig 2. Calibration plots for CMD prediction models.** Risk probabilities for six diseases (A-  
270 F), were split into deciles and mean risk probability for each decile was plotted vs. the portion  
271 of positive CMD cases in the decile for time horizon of 5 years.

272  
273 In this study, the predictive performance of linear Cox PH models was compared with  
274 ensemble non-linear models as discussed in the methods. Non-linear survival models  
275 demonstrated comparable performance with the linear Cox model; however, this required  
276 significantly more computation time.

## 277 **CMD risk factors**

278 To better understand the contribution of various risk factors to the pathophysiology of  
279 CMD, we ranked predictors of the risk of various CMD by the values of their regression  
280 coefficients (Table 4), indicating the degree of the association between the predictor and the  
281 outcome. Predictors presented in Table 4 represented only those with absolute values of  
282 coefficients larger than 0.8 and *p*-values less than 0.001 (see S1 Table for all coefficients).  
283 Statistical significance depended on the sample size and was affected by the prevalence of  
284 CMD. Accordingly, the number of predictors varied for each disease model.

285

286

287

288

289

290 **Table 4. Ranked regression coefficients of predictors of the risk of various CMD models.**

|               | Variable                             | Coefficient | lower 95% CI | upper 95% CI | <i>p</i> -value |
|---------------|--------------------------------------|-------------|--------------|--------------|-----------------|
| <b>CAD</b>    | Forced expiratory volume             | -3.45       | -4.08        | -2.82        | 3.18E-27        |
|               | Body mass index                      | 2.94        | 2.62         | 3.25         | 3.69E-76        |
|               | Age                                  | 2.29        | 2.15         | 2.43         | 8.19E-225       |
|               | Heart valve problem                  | 0.99        | 0.82         | 1.16         | 3.15E-29        |
|               | Sex                                  | 0.94        | 0.88         | 1.01         | 3.15E-156       |
|               | Family history of CAD (both parents) | 0.87        | 0.73         | 1.00         | 4.50E-36        |
|               | Hypercholesterol medication          | 0.84        | 0.78         | 0.89         | 9.91E-189       |
| <b>HPT</b>    | Diastolic blood pressure             | 4.72        | 4.58         | 4.87         | 0.00E+00        |
|               | Body mass index                      | 3.69        | 3.54         | 3.83         | 0.00E+00        |
|               | Forced expiratory volume             | -3.33       | -3.67        | -2.98        | 3.47E-81        |
|               | Age                                  | 2.43        | 2.35         | 2.51         | 0.00E+00        |
|               | Coffee consumption                   | -1.61       | -2.11        | -1.11        | 2.72E-10        |
|               | Congestive heart failure             | 1.32        | 0.93         | 1.70         | 2.45E-11        |
|               | Hypercholesterol medication          | 1.20        | 1.17         | 1.23         | 0.00E+00        |
|               | CAD age                              | -1.16       | -1.25        | -1.06        | 6.57E-124       |
| <b>DM2</b>    | Body mass index                      | 6.99        | 6.75         | 7.23         | 0.00E+00        |
|               | Forced expiratory volume             | -6.54       | -7.23        | -5.85        | 2.11E-77        |
|               | MET hours                            | -1.84       | -2.76        | -0.92        | 9.17E-05        |
|               | Hypercholesterol medication          | 1.82        | 1.76         | 1.89         | 0.00E+00        |
|               | Coffee consumption                   | -1.66       | -2.64        | -0.68        | 9.27E-04        |
|               | Age                                  | 1.45        | 1.30         | 1.61         | 1.55E-77        |
|               | Family history of DM2 (both parents) | 1.40        | 1.26         | 1.54         | 2.04E-85        |
|               | AHEI score                           | 0.93        | 0.69         | 1.16         | 4.87E-15        |
| <b>Stroke</b> | Forced expiratory volume             | -5.34       | -6.73        | -3.96        | 3.93E-14        |
|               | Age                                  | 3.17        | 2.83         | 3.50         | 7.46E-77        |
|               | Diastolic blood pressure             | 2.26        | 1.67         | 2.86         | 1.21E-13        |
|               | DVT age                              | -1.14       | -1.50        | -0.77        | 1.25E-09        |
|               | Diabetes age                         | -0.87       | -1.22        | -0.53        | 8.06E-07        |
|               | AHEI score                           | 0.85        | 0.37         | 1.33         | 5.58E-04        |
| <b>DVT</b>    | Forced expiratory volume             | -3.55       | -4.20        | -2.89        | 2.00E-26        |
|               | Body mass index                      | 2.58        | 2.26         | 2.90         | 3.42E-57        |
|               | Age                                  | 1.94        | 1.80         | 2.08         | 3.18E-156       |
| <b>AAA</b>    | Forced expiratory volume             | -5.99       | -8.64        | -3.33        | 9.78E-06        |
|               | Age                                  | 5.20        | 4.43         | 5.97         | 3.54E-40        |
|               | AHEI score                           | 1.98        | 1.12         | 2.83         | 5.83E-06        |
|               | Heart valve problem                  | 1.52        | 0.99         | 2.04         | 1.67E-08        |
|               | Sex                                  | 1.47        | 1.06         | 1.88         | 1.98E-12        |
|               | Current smoking                      | 1.15        | 0.89         | 1.40         | 3.68E-18        |
|               | Hypercholesterol medication          | 0.90        | 0.65         | 1.15         | 1.27E-12        |

291 Positive and negative signs indicate that corresponding factors increase or decrease the risk of  
 292 CMD, respectively. For the purpose of better presentation, only coefficients with absolute  
 293 values larger than 0.8 and *p*-values less than 0.001 are presented.

294 Across all disease models, age and low forced expiratory volume (FEV1) ranked as the  
295 most important predictors. Higher body mass index (BMI) and hypercholesterolemia  
296 medication were also among the strongest predictors for several models. Sex was ranked high  
297 only for the CAD and AAA, which is in a good agreement with our observation that the  
298 prevalence of these diseases was higher in men than in women. Family history ranked high  
299 only in predicting CAD and DM2. Nutrition was among the most important predictors for  
300 DM2, stroke, and AAA, which is likely explained by a healthier diet among individuals with  
301 certain risk factors and predispositions. Similarly, coffee consumption was an important  
302 predictor of HTN and DM2, possibly due to lower consumption in individuals with specific  
303 risk factor profiles. Physical activity was an important predictor only for DM2, and younger  
304 age of first occurrence of CAD, DVT and DM2 was among most important predictors for  
305 HTN and stroke, respectively.

## 306 **Validation**

307 C-indexes for corresponding risk prediction benchmark models, with age and sex as the  
308 only predictors, were lower (delta, 0.04 – 0.2) when compared to those of our newly  
309 developed models. Broad range applicability and consistency of the performance of the  
310 developed risk prediction models for each disease were further determined by assessing the  
311 discriminative ability across subpopulations (Table 5). These subpopulations included (1)  
312 ‘healthy’ participants without any of the six target CMD at the baseline; (2) participants with  
313 at least one pre-existing non-target CMD at the baseline; and (3) various age categories. The  
314 performance of the models was highest in younger age and the healthy subgroup; while it  
315 significantly dropped in the subpopulation with pre-existing CMD.

316 **Table 5. Validation of CMD risk prediction models.**

| Subpopulation                            | CAD         |             | HPT         |             | DM2         |             | Stroke      |             | DVT         |             | AAA         |             |
|------------------------------------------|-------------|-------------|-------------|-------------|-------------|-------------|-------------|-------------|-------------|-------------|-------------|-------------|
|                                          | Cases,<br>% | C-<br>index | Cases,<br>% | C-<br>index | Cases,<br>% | C-<br>index | Cases,<br>% | C-<br>index | Cases,<br>% | C-<br>index | Cases,<br>% | C-<br>index |
| <b>General<br/>(benchmark<br/>model)</b> | 3.6         | 0.716       | 13.8        | 0.689       | 3           | 0.673       | 0.7         | 0.712       | 3.5         | 0.678       | 0.19        | 0.837       |
| <b>Healthy +<br/>target CMD</b>          | 3.2         | 0.785       | 12.9        | 0.813       | 2.4         | 0.883       | 0.6         | 0.772       | 2.8         | 0.722       | 0.12        | 0.874       |
| <b>Unhealthy +<br/>target CMD</b>        | 9.3         | 0.656       | 43.5        | 0.693       | 7.9         | 0.724       | 1.8         | 0.677       | 9.5         | 0.62        | 0.66        | 0.794       |
| <b>CAD</b>                               | 100         | n/a         | 56.8        | 0.642       | 11.2        | 0.697       | 2.5         | 0.684       | 12.1        | 0.568       | 1.22        | 0.817       |
| <b>HPT</b>                               | 9.4         | 0.65        | 100         | n/a         | 7.8         | 0.72        | 1.7         | 0.655       | 9           | 0.637       | 0.74        | 0.775       |
| <b>DM2</b>                               | 14.5        | 0.631       | 52.5        | 0.624       | 100         | n/a         | 3.3         | 0.662       | 11.3        | 0.57        | 0.34        | 0.812       |
| <b>DVT</b>                               | 8.8         | 0.695       | 26.1        | 0.734       | 7.5         | 0.752       | 2.3         | 0.733       | 100         | n/a         | 0.7         | 0.907       |
| <b>Age &lt; 45</b>                       | 0.9         | 0.842       | 3.3         | 0.864       | 0.8         | 0.872       | 0.13        | 0.676       | 0.9         | 0.669       | 0.04        | 0.872       |
| <b>Age 45-55</b>                         | 1.9         | 0.769       | 7.6         | 0.824       | 1.9         | 0.894       | 0.4         | 0.744       | 2           | 0.711       | 0.02        | 0.725       |
| <b>Age 55-65</b>                         | 4.4         | 0.736       | 16.9        | 0.774       | 3.4         | 0.85        | 0.7         | 0.744       | 3.8         | 0.704       | 0.19        | 0.843       |
| <b>Age 65-75</b>                         | 7.7         | 0.707       | 26.5        | 0.736       | 5.2         | 0.825       | 1.9         | 0.661       | 7           | 0.665       | 0.54        | 0.823       |

317 The performance of CMD models was tested on four different age group subpopulations.

318 Healthy subpopulation included individuals without *any* CMD at the baseline. Unhealthy

319 subpopulation included cases with any non-target CMD at the baseline.

320

## 321 **Discussion**

### 322 **Principal findings**

323 In this study, development and validation of a risk assessment platform applicable to six  
324 CMD is presented. The population-specific modeling for this platform was done using a  
325 dataset from the UK Biobank – a very large, longitudinal cohort study. This allowed us to  
326 derive prediction models and identify the most important contributing risk factors even for  
327 diseases with low incidence. Inclusion of a broad spectrum of risk factors allowed for  
328 modification of the array of input variables for the CMD risk prediction models included into  
329 the platform without significant decrease in their predictive performance. The models  
330 performed with high discriminative ability as demonstrated through extensive validation for  
331 different disease and age group subpopulations. Accordingly, this platform can accommodate  
332 different types of data sets and is applicable to population analysis, as well as individual  
333 assessment.

334 There is an abundance of risk predictors for CMD, and multiple prior attempts of  
335 combining them into risk calculators [17-19]. One of the major impediments for wide-spread  
336 application of these risk predictors includes lack of uniform validation through large  
337 population analyses. A comprehensive review found 363 models for cardiovascular risk  
338 stratification that have been developed and reported [20]. Only a minor collection of these  
339 models had sufficient evaluation according to contemporaneous analysis standards for either  
340 development or validation. For example, 39% of the 363 models analyzed utilized C-statistics  
341 for their development, and just over 60% for their validation. An even smaller number of the  
342 models utilized calibration as any part the performance measures. Although, the more recent



343 models (since 2009) were more consistent in providing performance reports: 76% as part of  
344 their development, and up to 90% as part of validation [20].

345 In the current study, the discriminative ability of the developed models was similar or  
346 exceeded established models when available. For example, the Framingham Risk Score for  
347 coronary artery disease have been determined to be close to 0.76 and 0.79 for men and women,  
348 respectively [21]; these reported results were obtained only in the presence of all of the  
349 laboratory data and for a pre-selected small population. The modeling described for the platform  
350 in this report allows for incorporation of contemporary risk information. This is becoming  
351 increasingly important, since such more limited risk calculators may fail to express the accurate  
352 and true risk for a significant population. As demonstrated previously, either 50% of patients  
353 with CMD lack conventional risk factors or the conventional risk factors fail to explain more  
354 than 15-50% of the incidence of CHD [22-26].

355 The ability to incorporate socioeconomical data and nutritional information collectively  
356 can complement the basic information that is equivalent to conventional biomarkers. This is  
357 demonstrated in this study, as the performance of the current platform was achieved without  
358 the utilization of the blood laboratory information, such as lipid levels or blood glucose levels  
359 (as those were not available in UKBB at the time of this study). Utilization of a polygenic  
360 scoring is underway and can reveal a population at risk or protected from development of  
361 CMD [27-29]. It is expected that incorporation of the polygenic scoring will further increase  
362 the predicative performance of the current platform.

### 363 **Limitations of this study**

364 Considering the fact that the UKBB population is not a complete representative of the  
365 UK or US populations, the main limitation of this study is that the developed models may

366 need to be examined with inclusion of more diverse population. Predictive performance of  
367 the models was higher when tested on healthier and younger subpopulations. At the same  
368 time, training and calibration on CMD-specific datasets are required to improve  
369 discriminative ability of the models across CMD subpopulations. Considering the fact that  
370 the datasets used in predictive modeling were almost identical for different CMD, various  
371 predictive performances of the CMD models imply that despite overlapping  
372 pathophysiological pathways for various CMD, there are predictors specific for different  
373 CMD.

### 374 **Future directions**

375 Considering computational limitations of non-linear survival models, bivariate time-  
376 dependent classification models utilizing machine learning algorithms can be used in future  
377 for determining the probability of CMD events at certain time horizons. The availability of  
378 relatively large healthcare datasets will further support the application of deep learning in  
379 time-dependent risk predictive modeling feasible. Incorporation of genetic and other -omics  
380 data may further improve the predictive functionality provided by this platform.

### 381 **Conclusions**

382 In this report, we present development and validation of a new generation of disease risk  
383 prediction models. The differentiation variables of this platform include: a) assessment of  
384 multiple related diseases according to their associated outcomes (not just coronary artery  
385 disease); b) inclusion of contemporary risk factors; c) variable engineering and processing  
386 that allows for inclusion of data from different sources and addressing missing data points; d)  
387 population-specific stratification to assess risk prediction in different subgroups; e) being  
388 modular in nature to allow for inclusion of other risk determinants, such as genetic

389 information; and f) being applicable at individual, as well as population level. These  
390 variables were designed into the platform in order to provide applicability of risk prediction to  
391 managing and changing the course of cardiometabolic diseases.

392

393

#### 394 **Acknowledgements**

395 This research has been conducted using the UK Biobank Resource under Application Number  
396 24626.

## 397      **References**

- 398      1. Benjamin EJ, Virani SS, Callaway CW, Chang AR, Cheng S, Chiuve SE, et al. The American  
399      Heart Association Council on Epidemiology and Prevention Statistics Committee and Stroke  
400      Statistics Subcommittee. H2018 update: a report from the American Heart. *Circulation* 2018  
401      Jan 31. DOI: 10.1161/CIR.0000000000000558.
- 402      2. Muka T, Imo D, Jaspers L, Copani V, Chaker L, van der Lee SJ, et al. The global impact of non-  
403      communicable diseases on healthcare spending and national income: a systematic  
404      review. *Eur J Epidemiol.* 2015 30(4): 251-77.
- 405      3. Neumann PJ, Cohen JT, Cost savings and cost-effectiveness of clinical preventive care. *Synth*  
406      *Proj Res Synth Rep.* 2009 (18). pii: 48508. doi: 48508. Epub 2009 Sep 1.
- 407      4. Anderson KM, Odell PM, Wilson PW, Kannel WB. Cardiovascular disease risk profiles. *Am*  
408      *Heart J.* 1991; 121: 293-8. doi:10.1016/0002-8703(91)90861-B. pmid:1985385.
- 409      5. Conroy RM, Pyörälä K, Fitzgerald AP, et al. SCORE project group. Estimation of ten-year risk  
410      of fatal cardiovascular disease in Europe: the SCORE project. *Eur Heart J.* 2003; 24:987-1003.
- 411      6. Hippisley-Cox J, Coupland C, Robson J, Brindle P. Derivation, validation, and evaluation of a  
412      new QRISK model to estimate lifetime risk of cardiovascular disease: cohort study using  
413      QRResearch database. *BMJ* 2010;341:c6624. doi:10.1136/bmj.c6624. pmid:21148212.  
414
- 415      7. Wang J, Tan G, Han L, Bai Y, He M, Liu H. Novel Biomarkers for Cardiovascular risk  
415      prediction. *J Geriatr Cardiol.* 2017 Feb; 14(2): 135–150.
- 416      8. Palmer LJ. UK Biobank: bank on it. *Lancet* 2007; 369: 1980-1982.

- 417 9. Craig CL, Marshall AL, Sjöström M, Bauman AE, Booth ML, Ainsworth BE, et al. International  
418 physical activity questionnaire: 12-country reliability and validity. *Med Sci Sports Exerc.*  
419 2003; 35(8):1381-95.
- 420 10. Chiuve SE, Fung TT, Rimm EB, Hu FB, McCullough ML, Wang M, et al. Alternative dietary  
421 indices both strongly predict risk of chronic disease. *J Nutr.* 2012; 142(6):1009-18.
- 422 11. White IR, Royston P, Wood AM. Multiple imputation using chained equations: issues and  
423 guidance for practice. *Stat Med.* 2011; 30: 377-399.
- 424 12. Minka T. Automatic choice of dimensionality for PCA. No. 5141-16. M.I.T. media laboratory  
425 perceptual computing section technical report; 2000.
- 426 13. Harrell FE, Califf RM, Pryor DB, Lee KL, Rosati RA. Evaluating the yield of medical tests.  
427 *Journal of the American Medical Association.* 1982; 247:2543-46.
- 428 14. Harrell FE, Lee KL, Califf RM, Pryor DB, Lee KL, Rosati RA. Regression modeling strategies for  
429 improved prognostic prediction. *Statistics in Medicine.* 1984; 3:143-52.
- 430 15. Harrell FE, Lee KL, Mark DB. Multivariable prognostic models: issues in developing models,  
431 evaluating assumptions and adequacy, and measuring and reducing errors. *Statistics in*  
432 *Medicine.* 1996; 15:361-87.
- 433 16. Hosmer DW, Hosmer T, Le Cessie S, Lemeshow S. A comparison of goodness-of-fit tests for  
434 the logistic regression model. *Statistics in Medicine.* 1997; 16:965-980.
- 435 17. Piepoli MF, Hoes AW, Agewall S, Albus C, Brotons C, Catapano AL, et al. 2016 European  
436 Guidelines on cardiovascular disease prevention in clinical practice: The Sixth Joint Task  
437 Force of the European Society of Cardiology and Other Societies on Cardiovascular Disease  
438 Prevention in Clinical Practice (constituted by representatives of 10 societies and by invited

- 439 experts) Developed with the special contribution of the European Association for  
440 Cardiovascular Prevention & Rehabilitation (EACPR). *Atherosclerosis*. 2016; 252:207–74.
- 441 18. Goff DC Jr., Lloyd-Jones DM, Bennett G, Coady S, D'Agostino RB Sr., Gibbons R, et al. 2013  
442 ACC/AHA guideline on the assessment of cardiovascular risk: a report of the American  
443 College of Cardiology/American Heart Association Task Force on Practice Guidelines. *J Am*  
444 *Coll Cardiol*. 2014;63(25 Pt B):2935–59.
- 445 19. Hippisley-Cox J, Coupland C, Vinogradova Y, Robson J, Minhas R, Sheikh A, et al. Predicting  
446 cardiovascular risk in England and Wales: prospective derivation and validation of  
447 QRISK2. *Bmj*. 2008;336(7659):1475–82.
- 448 20. Damen JA, Hooft L, Schuit E, Debray TP, Collins GS, et al. Prediction models for  
449 cardiovascular disease risk in the general population: systematic review. *BMJ*. 2016; 353:  
450 i2416.
- 451 21. D'Agostino RB, Vasan RS, Pencina MJ, Wolf PA, Cobain M; Massaro JM et al. General  
452 Cardiovascular Risk Profile for Use in Primary Care: the Framingham Heart Study.  
453 *Circulation*. 2008; 117(6):743-53.
- 454 22. Hennekens CH. Increasing burden of cardiovascular disease: current knowledge and future  
455 directions for research on risk factors. *Circulation*.1998;97:1095-1102.
- 456 23. McKechnie RS, Rubenfire M. The role of inflammation and infection in coronary artery  
457 disease: a clinical perspective. *ACC Curr J Rev*. 2002;11:32-34.
- 458 24. Futterman LG, Lemberg L. Fifty percent of patients with coronary artery disease do not have  
459 any of the conventional risk factors. *Am J Crit Care*.1998;7:240-244.
- 460 25. Lefkowitz RJ, Willerson JT. Prospects for cardiovascular research. *JAMA*.2001;285:581-587.

- 461 26. Khot UN, Khot MB, Bajzer CT, Sapp SK, Ohman M, Brener SJ, et al. Prevalence of  
462 Conventional Risk Factors in Patients with Coronary Heart Disease JAMA. 2003;290(7):898-  
463 904.
- 464 27. Kathiresan S, Melander O, Anevski D, Guiducci C, Burt NP, Roos C, et al. Polymorphisms  
465 Associated with Cholesterol and Risk of Cardiovascular Events. N Engl J Med 2008;  
466 358:2299-2300
- 467 28. Khera AV, Emdin CA, Drake I, Natarajan P, Bick AG, et al. Genetic Risk, Adherence to a  
468 Healthy Lifestyle, and Coronary Disease. N Engl J Med 2016; 375:2349-58.
- 469 29. Khera AV, Chaffin M, Aragam KG, Haas ME, Roselli C, Choi SH, et al. Genome-wide polygenic  
470 scores for common diseases identify individuals with risk equivalent to monogenic  
471 mutations. Nat Genet. 2018; 50(9):1219-1224.

472

473

## 474 **Supporting information**

475 **S1 Table. Cox PH model regression coefficients for six CMD.** Regression coefficients (coef) and  
476 corresponding standard errors (se), *p*-values, lower and upper 95% confidence intervals are  
477 presented.

478

### 479 **Funding Source:**

480 The funder, Precision Wellness, Inc., provided support in the form of salaries for authors AT and  
481 IP, consultancy fees to AG, and as an unrestricted research grant to Stanford University (led by  
482 EI), but did not have any additional role in the study design, data collection and analysis,

483 decision to publish, or preparation of the manuscript. MR did not receive any financial  
484 compensation for participation. The specific roles of these authors are articulated in the  
485 'Author contributions' section.

486

487 **Author Contributions:**

- 488 1. Conceptualization: MR AT
- 489 2. Data curation: IP AT
- 490 3. Formal analysis: IP
- 491 4. Funding acquisition: MR
- 492 5. Investigation: MR AT EI
- 493 6. Methodology: MR AT IP AG EI
- 494 7. Project administration: MR AT
- 495 8. Resources: MR
- 496 9. Software: AT IP
- 497 10. Supervision: MR AT
- 498 11. Validation: MR EI AG
- 499 12. Visualization: IP
- 500 13. Writing – original draft: AT IP MR
- 501 14. Writing – review & editing: MR EI AG
- 502



# Figure 2

## A

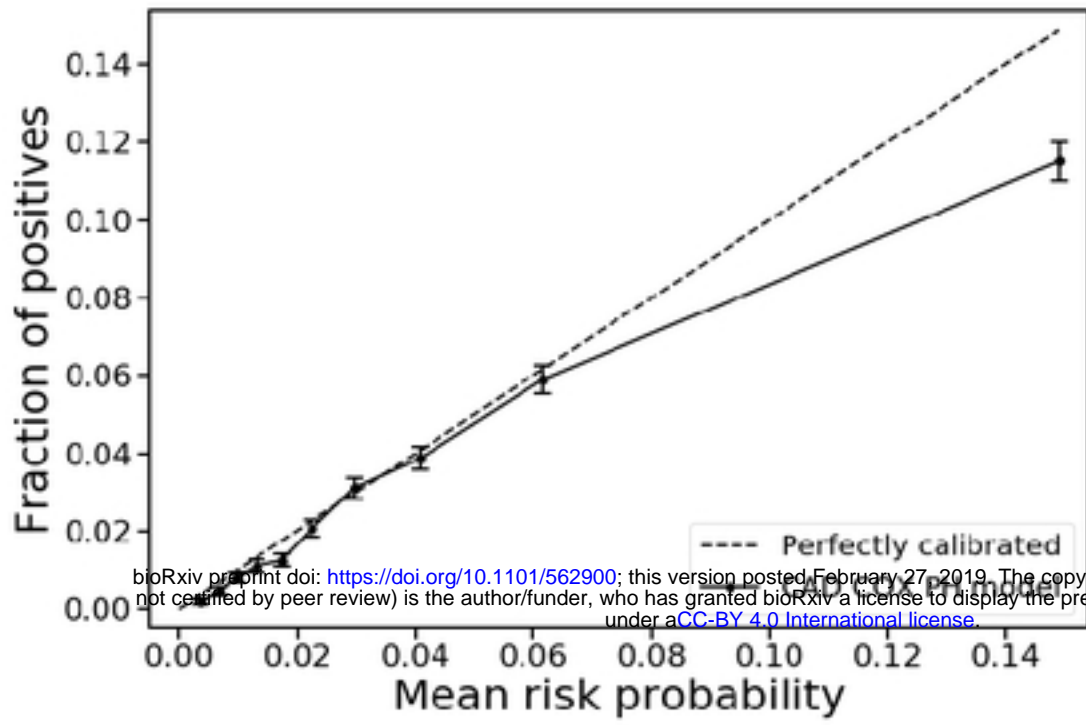

## B

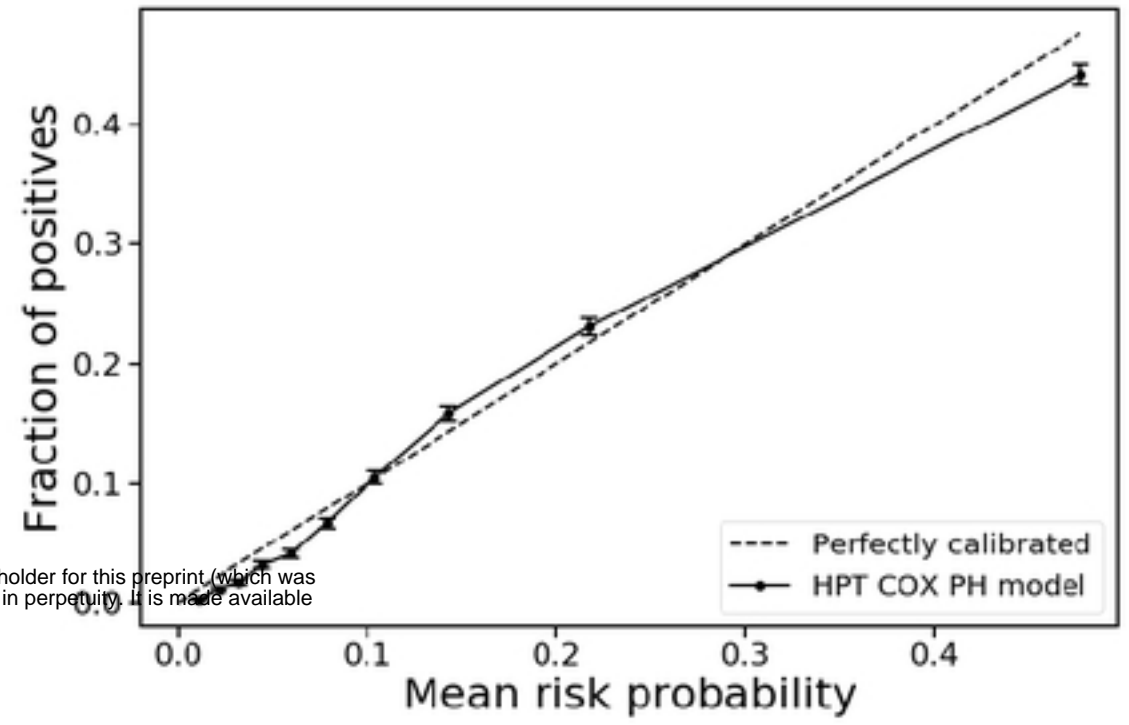

## C

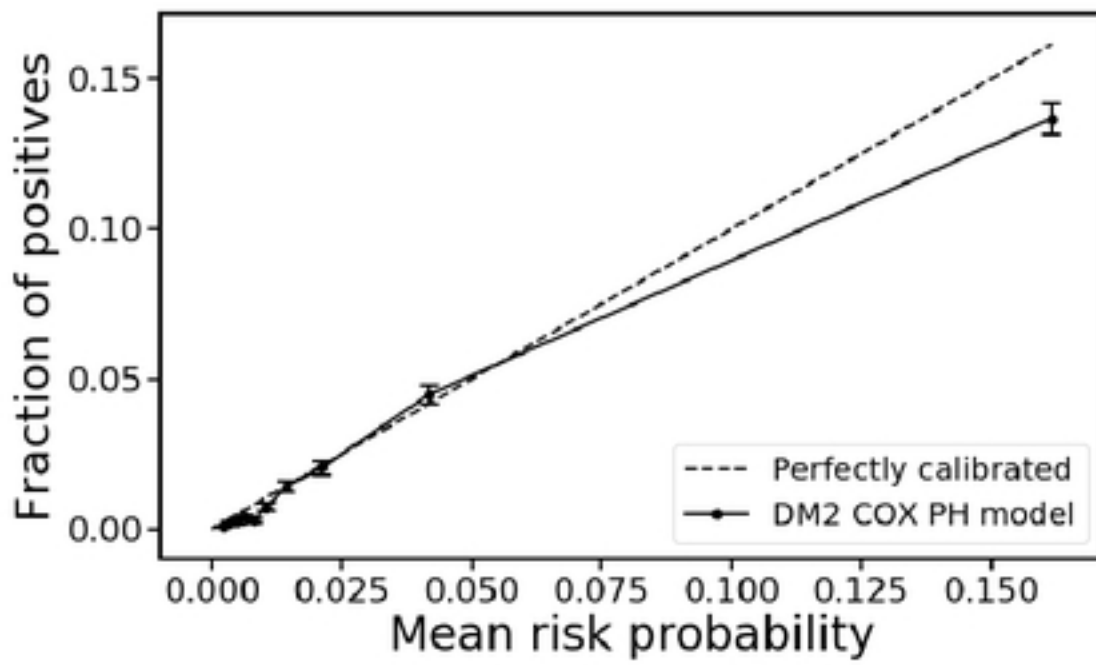

## D

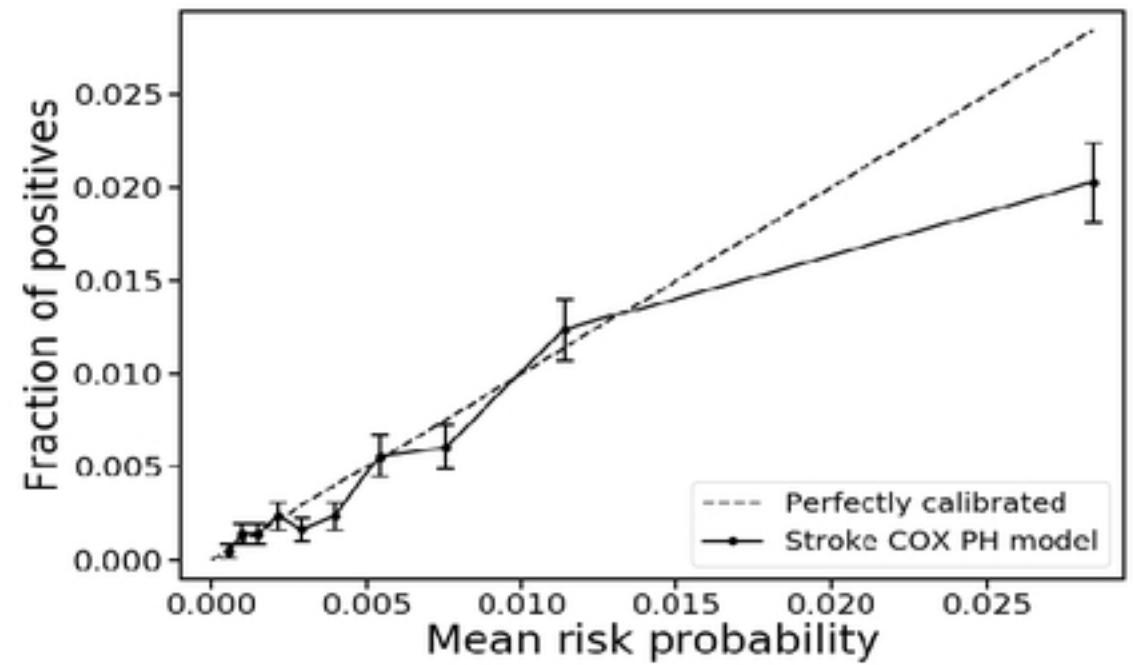

## E

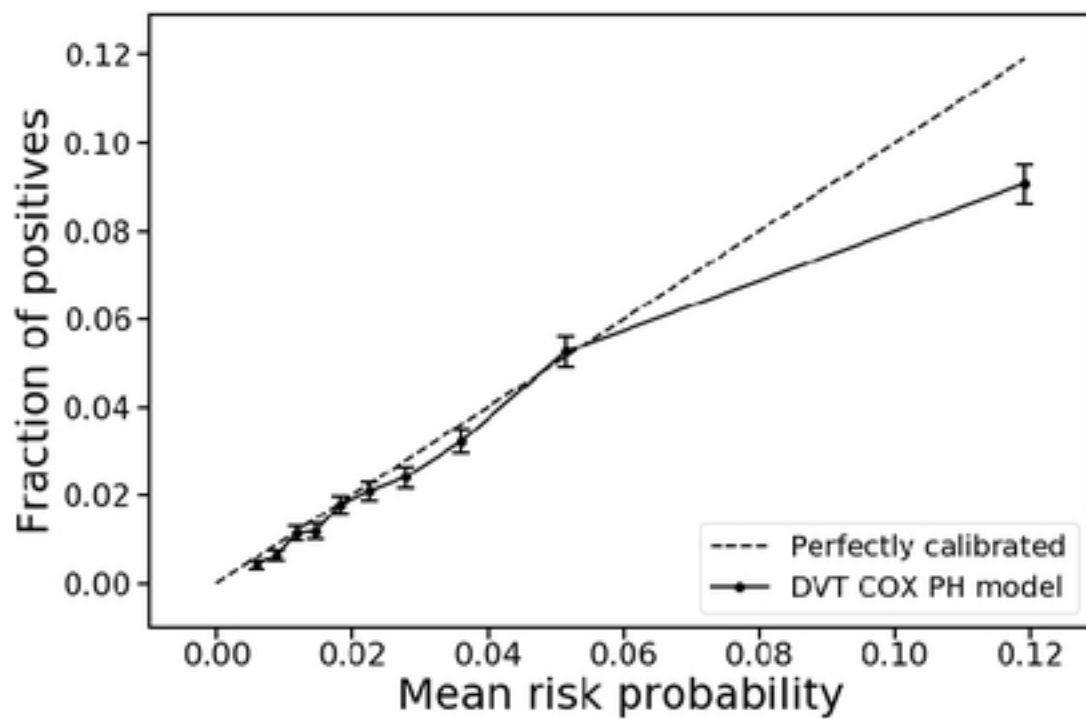

## F

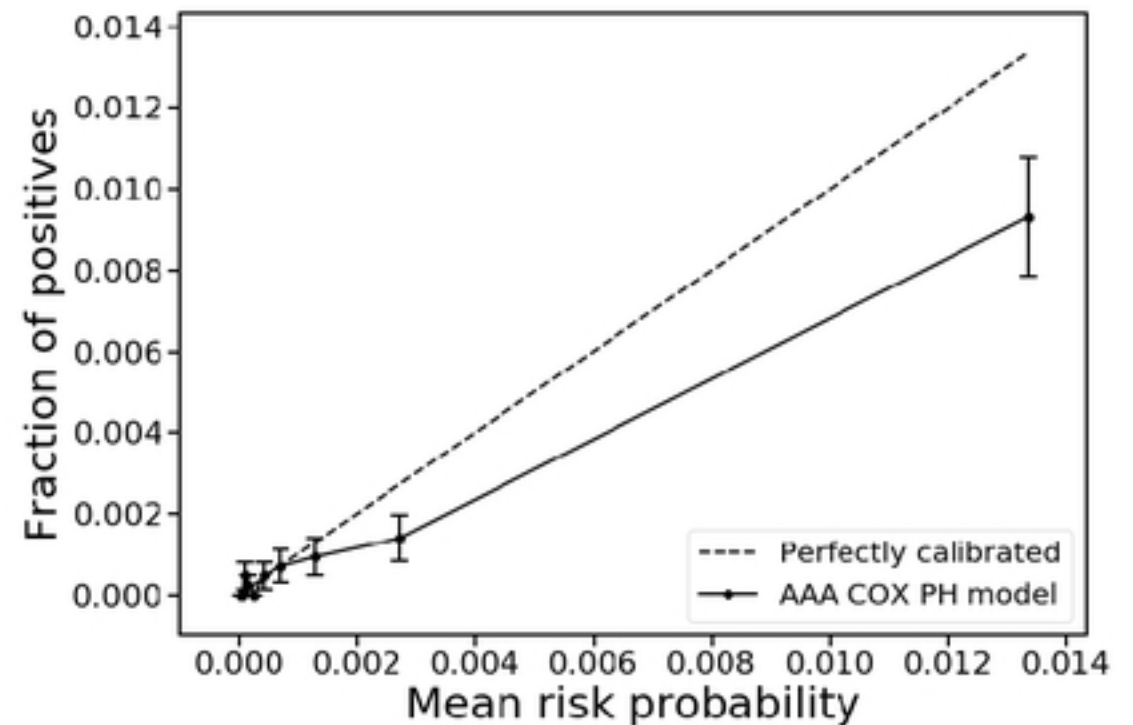

# Figure 1

**A**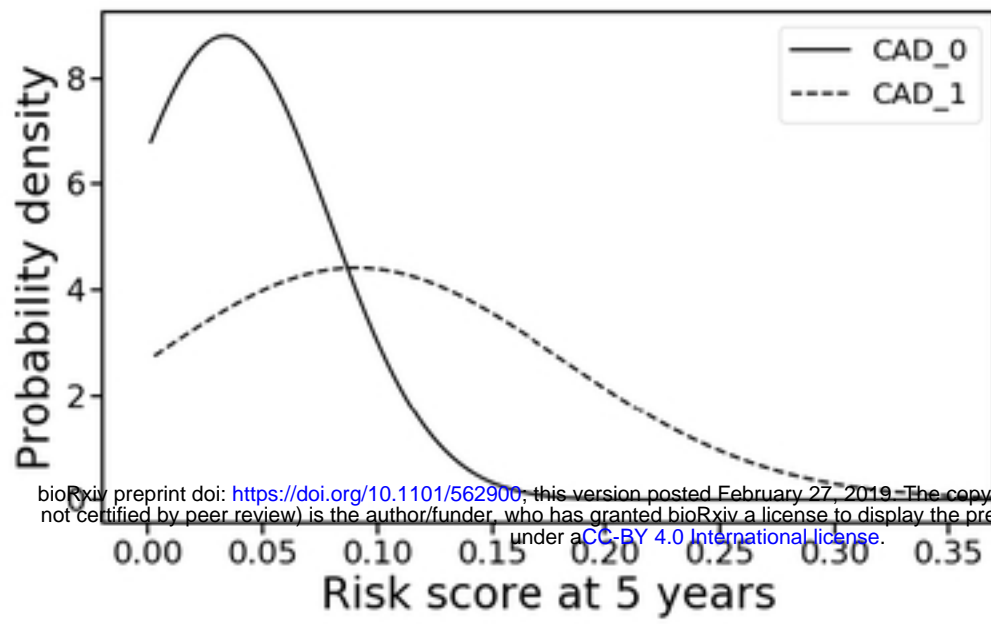**B**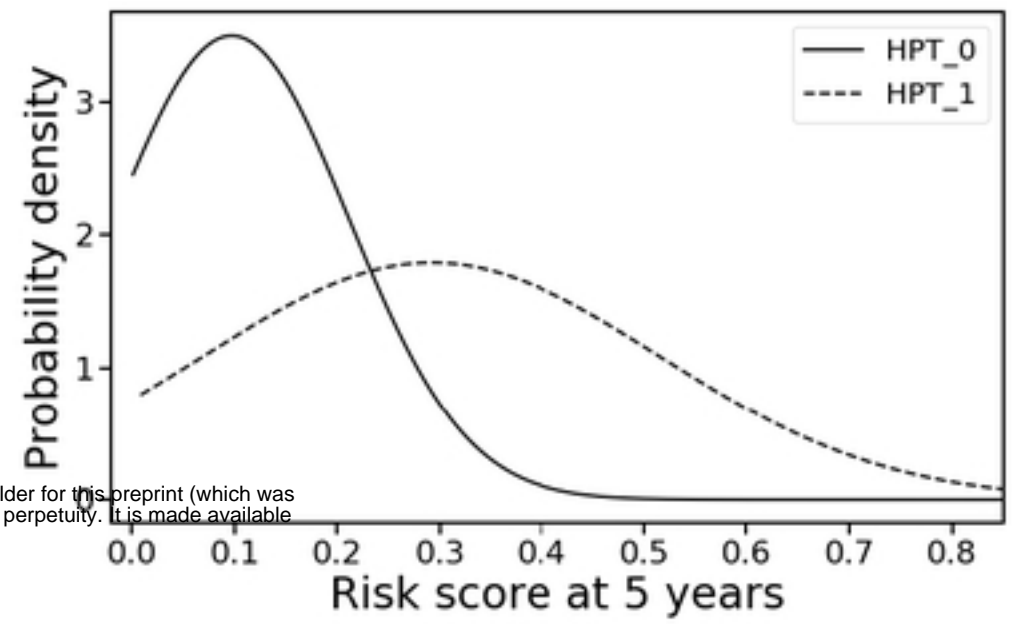**C**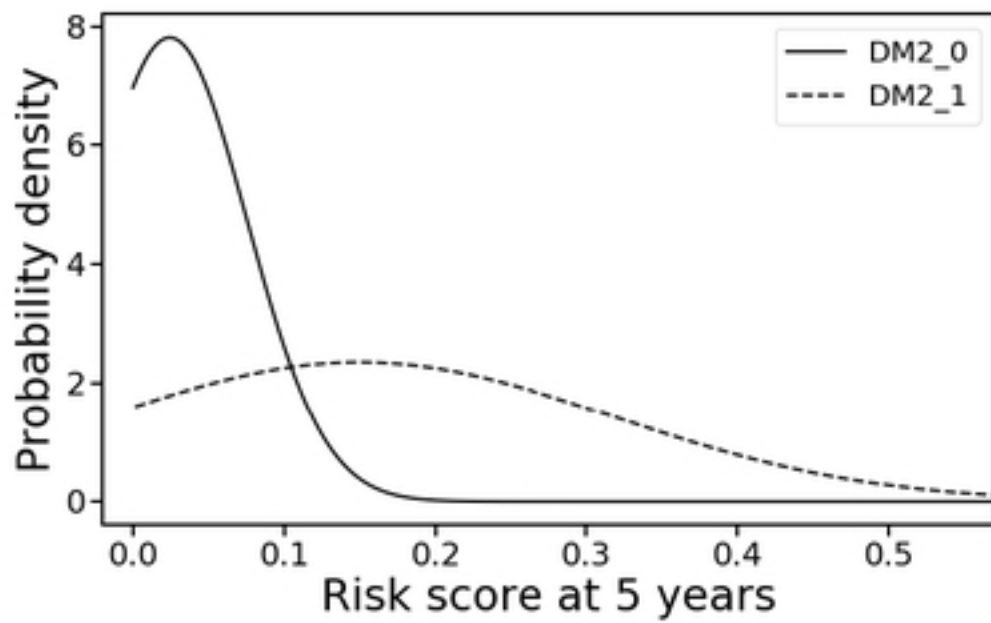**D**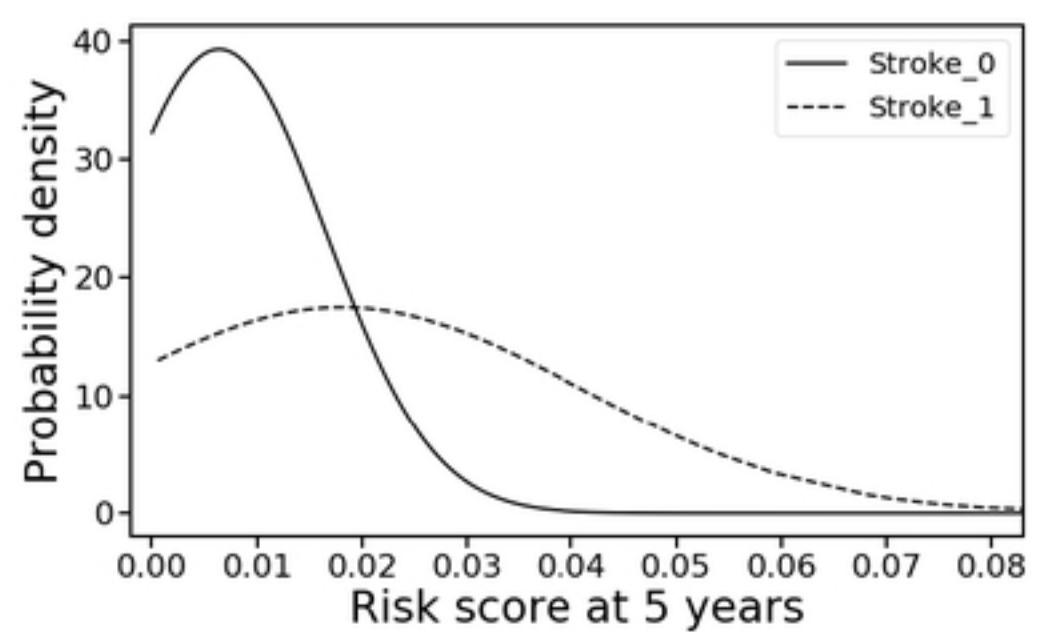**E**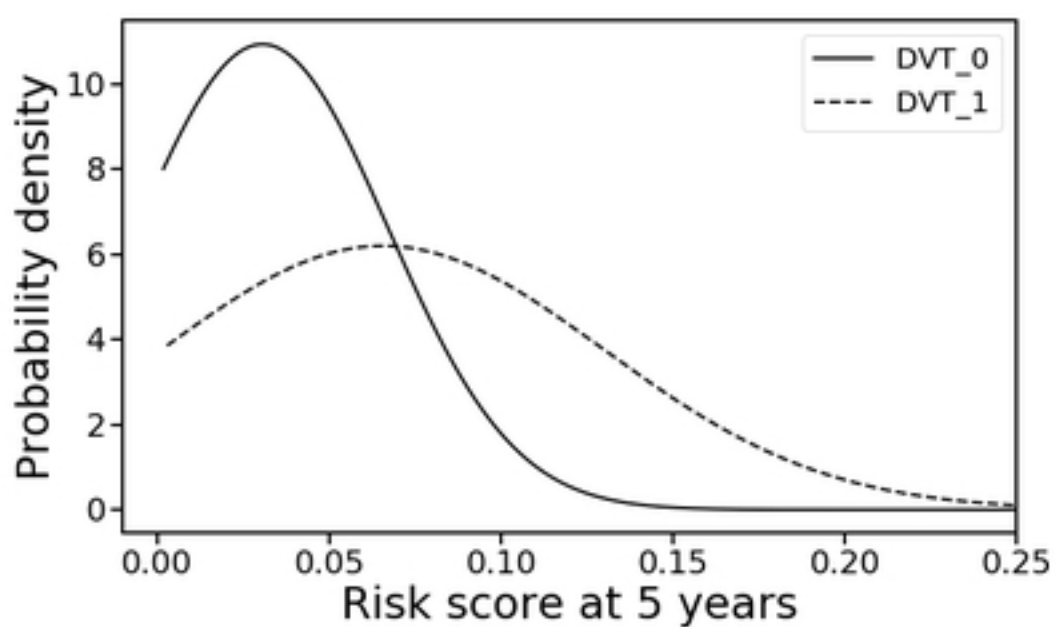**F**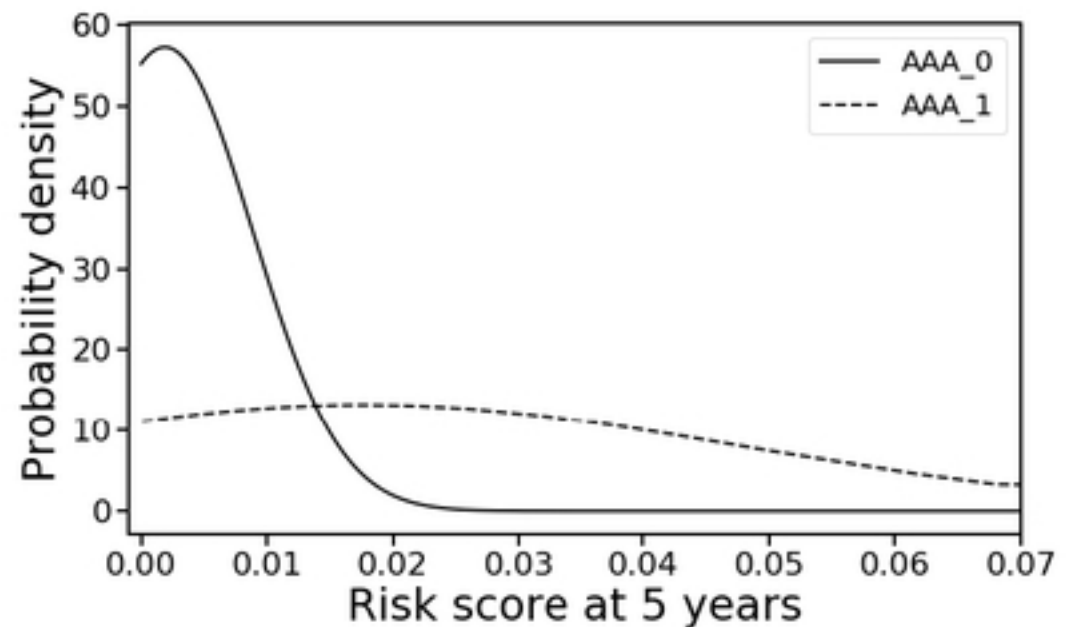

Source: http://biorxiv.org/content/10.1101/562900v1.full.pdf
